# Supplementary material
Source: Research Square preprint supplement (doi:10.21203/rs.3.rs-9295605/v1)
Supplement: Supplementary file 1 [file 6ab4f4b482a8c4d20823fc3a.pdf]

1  
2  
3  
4  
5  
6  
7  
8  
9  
10  
11  
12  
13  
14  
15  
16  
17  
18  
19  
20  
21  
22  
23  
24  
25

Supporting Information for “No detectable  
inflection point in U.S. oil and gas methane  
emissions following the Inflation Reduction Act”

Ao Chen<sup>1\*</sup>, William S. Daniels<sup>1</sup>, Ziting Huang<sup>1</sup>,  
Arvind P. Ravikumar<sup>2</sup>, Sarah M. Jordaan<sup>3</sup>, Zhen Zhang<sup>4</sup>,  
Leyang Feng<sup>1</sup>, Hanyu Liu<sup>1</sup>, Lee T. Murray<sup>5</sup>, Xueying Yu<sup>6</sup>,  
Dylan C. Gaeta<sup>1</sup>, Kristan L. Morgan<sup>1</sup>, Jialuo Yuan<sup>7</sup>,  
Scot M. Miller<sup>1\*</sup>

<sup>1</sup>Department of Environmental Health and Engineering, Johns Hopkins  
University, Baltimore, MD, 21205, USA.

<sup>2</sup>Hildebrand Department of Petroleum and Geosystems Engineering, The  
University of Texas at Austin, Austin, TX, 78712, USA.

<sup>3</sup>Department of Civil Engineering, McGill University, Montreal, Quebec,  
H3A 0C3, Canada.

<sup>4</sup>National Tibetan Plateau Data Center (TPDC), State Key Laboratory of  
Tibetan Plateau Earth System, Environment and Resource (TPESER),  
Institute of Tibetan Plateau Research, Chinese Academy of Sciences,  
Beijing, 100101, China.

<sup>5</sup>Department of Earth and Environmental Sciences, University of  
Rochester, Rochester, NY, 14627, USA.

<sup>6</sup>Atmospheric Sciences Research Center, State University of New York at  
Albany, Albany, NY, 12226, USA.

<sup>7</sup>Department of Civil and Environmental Engineering, Stanford University,  
Stanford, CA, 94305, USA.

\*Corresponding author(s). E-mail(s): [achen152@jh.edu](mailto:achen152@jh.edu); [smill191@jhu.edu](mailto:smill191@jhu.edu);

## 26 Supplementary discussion

### 27 Sensitivity analysis of OH

28 Methane simulations in GEOS-Chem use archived OH fields that were previously  
29 generated from full chemistry simulations. By default, we use these archived fields  
30 in our study, as has been done in multiple previous studies [1, 2]. Several recent  
31 studies report that global OH mixing ratios changed by 1.6 – 4.0% in 2020 due to the  
32 COVID-19 pandemic, a variation not accounted for in the archived OH fields [3–6].

33 We further assess the impact of OH biases by reducing global OH fields by 1.6%  
34 – 4.0% in our regional inversion model, following recent constraints [3, 5]. In these  
35 sensitivity scenarios, total CONUS emissions decrease slightly from the baseline  
36 (scenario 3 in Table 1) from 56.8 Tg year<sup>-1</sup> to between 55.9 and 56.4 Tg year<sup>-1</sup>. This  
37 deviation of only 0.7%–1.5% confirms that our regional emission estimates are largely  
38 insensitive to global OH uncertainties within this range.

### 39 Uncertainty analysis and limitations

40 Our study is subject to several uncertainties and limitations. First, our ensemble  
41 detection limit is  $\sim 0.35$  Tg yr<sup>-1</sup> (defined as  $2\sigma$  of the ensemble variability) or  $\sim 0.60$   
42 Tg yr<sup>-1</sup> (defined as the full ensemble range width). Thus, we cannot rule out a  
43 counterfactual scenario where emissions would have risen more in the absence of the  
44 IRA. Hence, the observed absence of a detectable break may represent a “mitigated  
45 growth” rather than a policy failure. For  $\sim 0.35$  Tg yr<sup>-1</sup>, we define the detection  
46 threshold ( $\mathcal{L}_{det}$ ) as twice the standard deviation ( $2\sigma$ ) of the ensemble. We take the  
47 standard deviation of the ensemble and multiply that number by 1.96 (or 2), analogous  
48 to a 95% confidence interval, and we cannot rule out a change in emissions smaller  
49 than this detection limit.

$$\mathcal{L}_{det} = 2\sigma = 2 \times \sqrt{\frac{1}{N-1} \sum_{i=1}^N (\Delta E_i - \overline{\Delta E})^2} \quad (\text{S1})$$

50 where  $N$  represents the number of ensemble members ( $N = 8$  in this study),  $\Delta E_i$   
51 denotes the year-over-year change in CONUS O&G methane emissions for the year-  
52 2024 compared to 2023 ( $\Delta E_i = E_{2024,i} - E_{2023,i}$ ) for the  $i$ -th scenario, and  $\overline{\Delta E}$  is the  
53 ensemble mean of these year-over-year emission changes.

54 For  $\sim 0.60$  Tg yr<sup>-1</sup>, we define the conservative detection threshold ( $\mathcal{L}_{det}$ ) as the  
55 full width of the ensemble range (maximum minus minimum):

$$\mathcal{L}_{det} = \max_{i=1}^N (\Delta E_i) - \min_{i=1}^N (\Delta E_i) \quad (\text{S2})$$

56 where  $N$  represents the number of ensemble members ( $N = 8$  in this study), and  
57  $\Delta E_i$  denotes the year-over-year change in CONUS O&G methane emissions ( $\Delta E_i =$   
58  $E_{2024,i} - E_{2023,i}$ ) for the  $i$ -th scenario. This threshold represents the conservative  
59 envelope of structural uncertainty for distinguishing a physical trend from inverse  
60 model noise.

61 Second, we present the ensemble range of these 8 scenarios in the results, but  
62 we note that this ensemble range is not the same as the posterior uncertainties. We  
63 rely on the ensemble range rather than the posterior error covariance matrix ( $\hat{\mathbf{S}}$ ) or  
64 Monte Carlo simulations due to computational considerations. The L-BFGS method is  
65 an efficient optimization algorithm that we can use to estimate millions of unknown  
66 emissions points in the inverse model, but it does not provide a mathematical estimate  
67 of the posterior uncertainty. An alternative approach to the uncertainties would be to  
68 generate a large number of Monte Carlo simulations, but this approach is precluded  
69 by computational constraints; a single year of our inverse modeling simulations with  
70 GEOS-Chem typically requires 25 days of computing time and approximately 100  
71 GB of storage. Scaling this simulation to 100 Monte Carlo simulations would demand  
72 prohibitive memory (over 10 TB per year) and time (approximately 2500 days if run  
73 sequentially), making it impractical for our analysis with the GEOS-Chem adjoint  
74 model. While algorithms exist to calculate posterior uncertainties without additional  
75 simulations [7], the current flexibility of the GEOS-Chem adjoint model limits their  
76 immediate implementation. Consequently, we utilize the ensemble range to calculate  
77 the uncertainty. An upside of this approach is that we are able to evaluate the effect  
78 of different model configurations on the emissions estimate (e.g., different covariance  
79 matrix parameters, different constructions of the prior), something that traditional  
80 posterior uncertainty estimates do not capture.

81 Third, the attribution of emissions to specific sources introduces additional uncer-  
82 tainty in the posterior estimates. Specifically, our approach relies on the relative ratio  
83 of anthropogenic versus wetland emissions in prior bottom-up inventories; consequently,  
84 errors in this partitioning could propagate into the estimated source attribution. Import-  
85 antly, however, this attribution method implies that our results depend on the relative  
86 magnitude of the emissions inventories used as predictor variables in the inverse model  
87 rather than their absolute magnitudes [8].

88 Beyond these uncertainties, the consistency (or inconsistency) of TROPOMI data  
89 coverage is an additional concern. TROPOMI generally provides over 500 valid obser-  
90 vations per  $0.5^\circ$  latitude by  $0.625^\circ$  longitude grid box per season across most of our  
91 CONUS domain. However, we do see some spatial heterogeneity in observational cover-  
92 age (see Fig. S5 – S6). An important caveat is the reduced observation density in the  
93 Northwestern U.S. (e.g., Washington, Oregon, Idaho, and Montana) during winter and  
94 spring, driven by persistent cloud cover. This seasonality limits the inverse model’s  
95 sensitivity to emission changes in these regions during colder months.

## 96 **Current status and uncertainty of the IRA**

97 Although many rules and grants under the IRA have officially been implemented,  
98 political turnover in Washington creates uncertainty about their long-term enforcement  
99 and funding, suggesting that the full methane emissions reductions have likely not yet  
100 been realized. Specifically, the IRA introduced a waste emissions charge on methane  
101 emissions from the oil and gas sector, setting a fee of \$900 per metric ton starting  
102 in 2024, increasing to \$1,200 in 2025, and \$1,500 in 2026 and beyond [9]. This fee  
103 was finalized but was just beginning to be implemented in 2024; however, a joint  
104 Congressional resolution disapproved the Final Waste Emissions Charge Rule on March

105 14, 2025. This disapproval, enacted as Public Law 119-2 on March 14, 2025, prevents  
 106 the WEC from taking effect and triggers a statutory prohibition against issuing any  
 107 “substantially the same” regulation in the future, thereby leaving the WEC without an  
 108 enforceable implementation mechanism despite the underlying statutory mandate [10].

109 The IRA also launched the Climate Pollution Reduction Grants pro-  
 110 gram, offering nearly \$5 billion to state and local governments for projects  
 111 like landfill methane gas capture ([https://www.epa.gov/inflation-reduction-act/  
 112 cprg-selected-applications-sector-waste-and-materials-management](https://www.epa.gov/inflation-reduction-act/cprg-selected-applications-sector-waste-and-materials-management)) [11]. The IRA  
 113 further established the Methane Emissions Reduction Program, allocating \$1.36 bil-  
 114 lion to provide technical and financial support to the oil and gas sector. ([https:  
 115 //www.epa.gov/inflation-reduction-act/methane-emissions-reduction-program](https://www.epa.gov/inflation-reduction-act/methane-emissions-reduction-program)) [12].  
 116 Specifically, this program offers \$850 million to help small oil and gas operators cut  
 117 methane emissions and \$350 million to 14 states for voluntary well plugging [12].  
 118 Although some funding (\$350 million has been awarded, the IRA’s full impact on U.S.  
 119 methane emissions remains unclear and depends on ongoing support.

120 Several additional voluntary international agreements and regulations in numerous  
 121 states could also help reduce U.S. methane emissions. Several states have established  
 122 methane (or greenhouse gas) emissions reduction targets, summarized in Table S2.  
 123 In addition, the U.S. has joined the Global Methane Pledge, committing to a 30%  
 124 reduction in methane emissions by 2030 compared to 2020 levels [13]. However, the  
 125 Global Methane Pledge is voluntary and not a binding U.S. domestic law. Note that  
 126 the U.S. officially withdrew from the Paris Agreement on January 27, 2026 [14] and has  
 127 effectively abandoned the Global Methane Pledge by repealing federal implementation  
 128 mechanisms (e.g., the WEC) .

## 129 More details of the L-BFGS method

130 We estimate the emissions ( $\mathbf{s}$ ) and coefficients ( $\boldsymbol{\beta}$ ) simultaneously by minimizing the  
 131 following equation:

$$L(\mathbf{s}, \boldsymbol{\beta}) = \frac{1}{2}(\mathbf{z} - \mathbf{h}(\mathbf{s}))^\top \mathbf{R}^{-1}(\mathbf{z} - \mathbf{h}(\mathbf{s})) + \frac{1}{2}(\mathbf{s} - \mathbf{X}\boldsymbol{\beta})^\top \mathbf{Q}^{-1}(\mathbf{s} - \mathbf{X}\boldsymbol{\beta}) \quad (\text{S3})$$

132

$$L(\mathbf{s}^*, \boldsymbol{\beta}) = \frac{1}{2}(\mathbf{z} - \mathbf{h}(\mathbf{s}^* \odot \mathbf{s}^*))^\top \mathbf{R}^{-1}(\mathbf{z} - \mathbf{h}(\mathbf{s}^* \odot \mathbf{s}^*)) + \frac{1}{2}(\mathbf{s}^* \odot \mathbf{s}^* - \mathbf{X}\boldsymbol{\beta})^\top \mathbf{Q}^{-1}(\mathbf{s}^* \odot \mathbf{s}^* - \mathbf{X}\boldsymbol{\beta}) \quad (\text{S4})$$

133 where  $L(\mathbf{s}, \boldsymbol{\beta})$  is the objective function to minimize. The transformation  $\mathbf{s} = \mathbf{s}^* \odot \mathbf{s}^*$   
 134 is employed to enforce the non-negativity constraint on the state vector  $\mathbf{s}$ , where  
 135  $\odot$  denotes the Hadamard product (element-wise multiplication). By parameterizing  
 136 the objective function in terms of  $\mathbf{s}^*$ , the original constrained optimization problem  
 137 is mapped into an unconstrained space, as  $(s_i^*)^2 \geq 0$  is guaranteed for any  $s_i^* \in \mathbb{R}$ .  
 138 We minimize this objective function using the Limited-memory Broyden-Fletcher-  
 139 Goldfarb-Shanno (L-BFGS) algorithm [15]. In our case, the number of observations  $n$   
 140 and the number of variables  $m$  to optimize are very large, so we use L-BFGS instead  
 141 of BFGS because L-BFGS can handle high-dimensional problems efficiently without  
 142 large memory requirements.

**Table S1** Timeline of U.S. methane regulations (2012–2026), including NSPS OOOO, OOOOa, OOOOb, EG OOOOc [16], Policy Rule Rollback [17].

| Year            | Instrument                          | Legal Basis                    | Summary                                                                                                                                                                                         |
|-----------------|-------------------------------------|--------------------------------|-------------------------------------------------------------------------------------------------------------------------------------------------------------------------------------------------|
| 2012<br>(Obama) | NSPS OOOO                           | Clean Air Act<br>(CAA) §111(b) | Did not regulate methane directly.<br>Regulated VOCs from new sources from August 23, 2011 to September 18, 2015.                                                                               |
| 2016<br>(Obama) | NSPS OOOOa                          | CAA §111(b)                    | Methane Added. Regulated methane from new sources from September 18, 2015 to December 6, 2022.                                                                                                  |
| 2020<br>(Trump) | Policy Rule Rollback                | Executive Action               | Rescission. Removed methane-specific requirements.                                                                                                                                              |
| 2021<br>(Biden) | Congressional Review Act Resolution | Legislative                    | Reinstatement. Congress nullified the 2020 rollback, instantly restoring NSPS OOOOa.                                                                                                            |
| 2022<br>(Biden) | Inflation Reduction Act             | CAA §136                       | WEC Established. Created the methane fee. Exemptions are legally tied to future compliance with EPA rules (specifically SIPs).                                                                  |
| 2024<br>(Biden) | NSPS OOOOb                          | CAA §111(b)&(d)                | Regulated methane from new sources after December 6, 2022.                                                                                                                                      |
| 2024<br>(Biden) | EG OOOOc                            | CAA §111(b)&(d)                | The Critical Gap. OOOOc requires states to submit SIPs by March 2026. However, No state submitted a SIP in 2024, so the "Regulatory Compliance Exemption" for WEC was technically inaccessible. |
| 2025<br>(Trump) | Repeal of WEC                       | Legislative                    | WEC and SIP termination. The WEC is repealed before the SIP deadline (2026). The exemption mechanism was never utilized.                                                                        |
| 2026<br>(Trump) | Endangerment Finding Revoked        | Executive Order                | Legal Void. Withdrawal of the health finding voids the legal basis for all NSPS and EG rules.                                                                                                   |

**Table S2** Statutory methane (or greenhouse gas) emissions reduction targets of each state [18]

| State          | Target                                                                                                                                                                           |
|----------------|----------------------------------------------------------------------------------------------------------------------------------------------------------------------------------|
| United States  | The U.S. has agreed to reduce methane emissions by 30% by 2030, compared to 2020 levels, under the Global Methane Pledge (voluntary).                                            |
| California     | By 2030, California aims to reduce methane by 40% compared to 2013 levels, under the SB 1383.                                                                                    |
| Colorado       | Colorado aims to cut greenhouse gas emissions by 26% by 2025, 50% by 2030 and 90% by 2050 from 2005 levels under HB 19-1261.                                                     |
| Connecticut    | Connecticut, under Public Act 18-82, targets greenhouse gas emissions reductions of 10% by 2020 (1990 baseline), and 45% by 2030 and 80% by 2050 (2001 baseline).                |
| Delaware       | Delaware plans to reduce greenhouse gas emissions, including methane, by 50% by 2030, compared to 2005 levels, under HB 99.                                                      |
| Hawaii         | Hawaii plans to achieve a zero-emissions economy no later than 2045, under HB 2182.                                                                                              |
| Maine          | By 2030, Maine aims to reduce greenhouse gas emissions, including methane, by 45% compared to 1990 levels.                                                                       |
| Maryland       | Maryland plans to reduce greenhouse gas emissions, including methane, by 25% by 2020 and 40% by 2030, compared to 2006 levels.                                                   |
| Massachusetts  | By 2050, Massachusetts aims to reduce greenhouse gas emissions, including methane, by 85% compared to 1990 levels, under SB 9.                                                   |
| Minnesota      | Minnesota aims to reduce greenhouse gas emissions by 30% by 2025, compared to 2005 levels.                                                                                       |
| Nevada         | Nevada plans to cut greenhouse gas emissions, including methane, by 28% by 2025, compared to 2005 levels, and by 45% by 2030, under SB 254.                                      |
| New Jersey     | By 2050, New Jersey plans to reduce greenhouse gas emissions, including methane, by 80% compared to 2006 levels, under the Global Warming Response Act.                          |
| New Mexico     | New Mexico aims to reduce greenhouse gas emissions, including methane, by 45% by 2030, compared to 2005 levels, under Executive Order 2019-003.                                  |
| New York       | New York plans to cut greenhouse gas emissions, including methane, by 40% by 2030, compared to 1990 levels, under the Climate Leadership and Community Protection Act.           |
| North Carolina | North Carolina aims to cut greenhouse gas emissions, including methane, by 40% by 2030, compared to 2005 levels under Executive Order 80.                                        |
| Oregon         | Oregon plans to reduce greenhouse gas emissions, including methane, by 10% by 2020, compared to 1990 levels, and by 75% by 2050, under HB 3543.                                  |
| Rhode Island   | By 2020, Rhode Island aims to cut greenhouse gas emissions, including methane, by 10% compared to 1990 levels, and by 45% by 2035, under the Resilient Rhode Island Act of 2014. |
| Vermont        | Vermont plans to reduce greenhouse gas emissions, including methane, by 40% by 2030, compared to 1990 levels, and by 80% by 2050, under HB 688.                                  |
| Virginia       | Virginia aims to achieve net-zero greenhouse gas emissions by 2045, including methane, under SB 94.                                                                              |
| Washington     | Washington plans to reduce greenhouse gas emissions, including methane, by 45% by 2030, compared to 1990 levels, and by 95% by 2050, under HB 2311.                              |

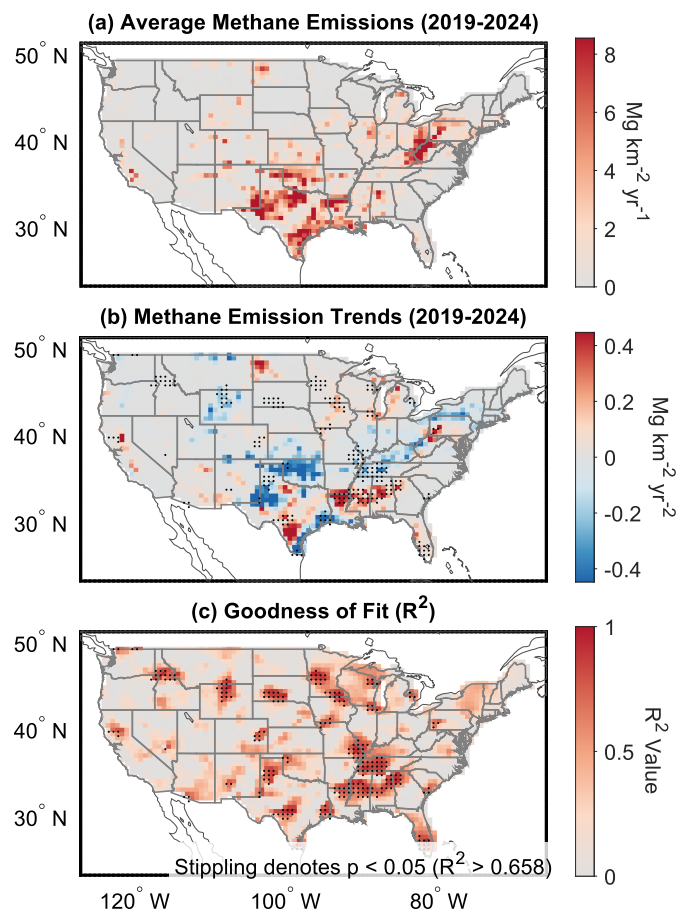

**Fig. S1** Spatial distribution of U.S. O&G methane emissions, linear emission trends, and R-squared value of the trend during 2019–2024. Panel (a) presents the multi-year average O&G methane emissions per grid ( $\text{Mg km}^{-2} \text{ yr}^{-1}$ ) for 8 scenarios. Panel (b) shows the pixel-wise linear emission trends calculated over the six-year period ( $\text{Mg km}^{-2} \text{ yr}^{-2}$ ). Panel (c) displays the goodness of fit (R-squared value) for the linear regression at each corresponding grid cell. The grid marked by black dots in the panels (b) and (c) denotes regions with statistically significant trends ( $p < 0.05$ ), which mathematically corresponds to an R-squared value greater than 0.658 for the 6-year sample size. Areas outside the CONUS are masked out.

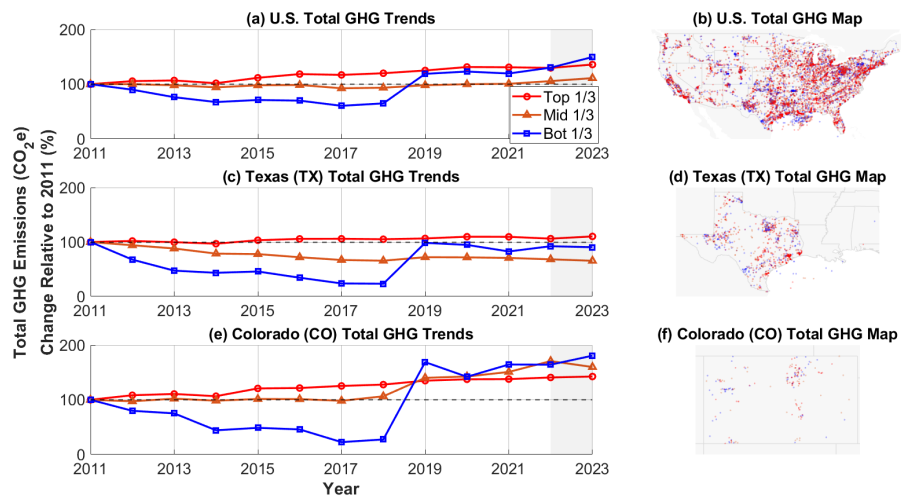

**Fig. S2** Trends and geographic distribution of reported GHG from the onshore O&G Production sector in the U.S., Texas, and Colorado from EPA GHGRP during years 2011–2023. Annual GHGRP onshore O&G GHG emissions relative to 2011 levels for facilities grouped by their average emission magnitude: Large (Top 1/3), Medium (Middle 1/3), and Small (Bottom 1/3) for (a) U.S. (c) Texas, and (e) Colorado. Facility locations colored by group in the (b) U.S. (d) Texas, and (f) Colorado. Note that facilities emitting less than 25,000 t CO<sub>2</sub>e are exempt for GHGRP and are not shown here.

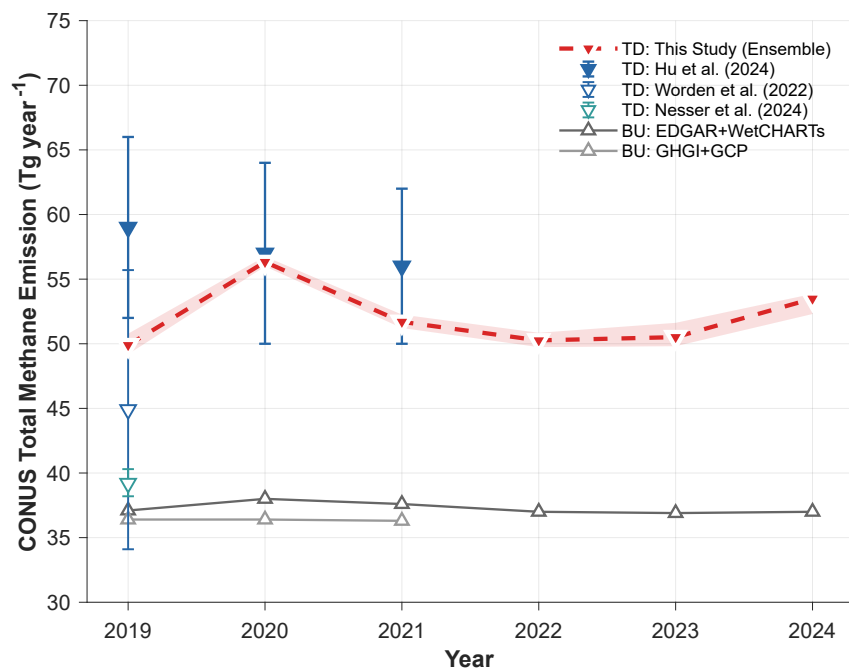

**Fig. S3** Total methane emission estimates from CONUS during 2019–2024. The figure presents a comprehensive comparison between our top-down estimates and previous work. Up-pointing triangles represent bottom-up (BU) inventory-based estimates (EDGAR+WetCHARTs and GHGI+GCP). Down-pointing triangles denote top-down (TD) inversion results from this study (red dashed line) and previous work, including Hu et al. [19], Worden et al. [20], and Nesser et al. [21]. Vertical bars represent the reported uncertainty or min–max ranges. Our results consistently show higher methane levels compared to official inventories, aligning with recent observation-based findings.

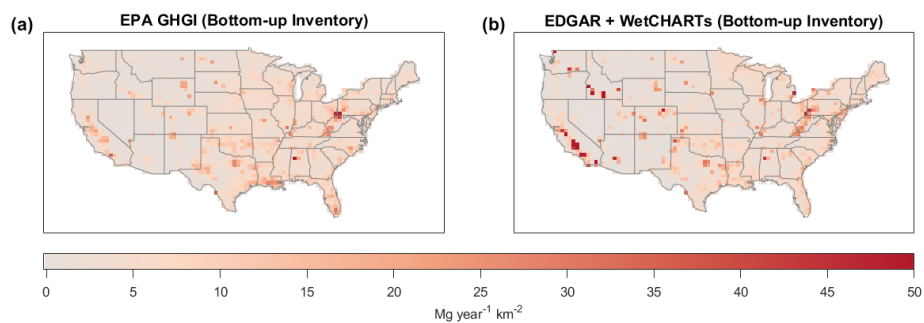

**Fig. S4** Spatial distribution of bottom-up methane emission inventories (2019–2024) used as predictor variables in the inverse model. Panels show total methane emission ( $\text{Mg yr}^{-1} \text{ km}^{-2}$ ) derived from (a) EPA + GCP and (b) EDGAR + WetCHARTs. These inventories are used in  $\mathbf{X}$  matrix in our inverse model.

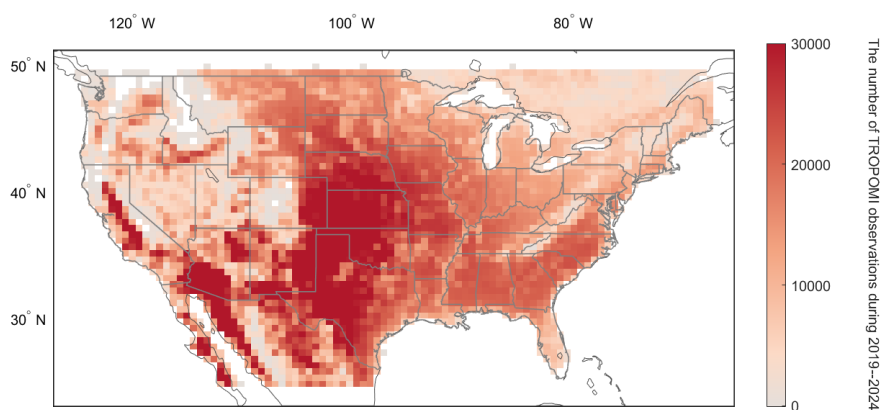

**Fig. S5** The number of satellite observations (the blended TROPOMI + GOSAT satellite data) during 2019–2024 at a  $0.5^\circ$  latitude by  $0.625^\circ$  longitude grid resolution.

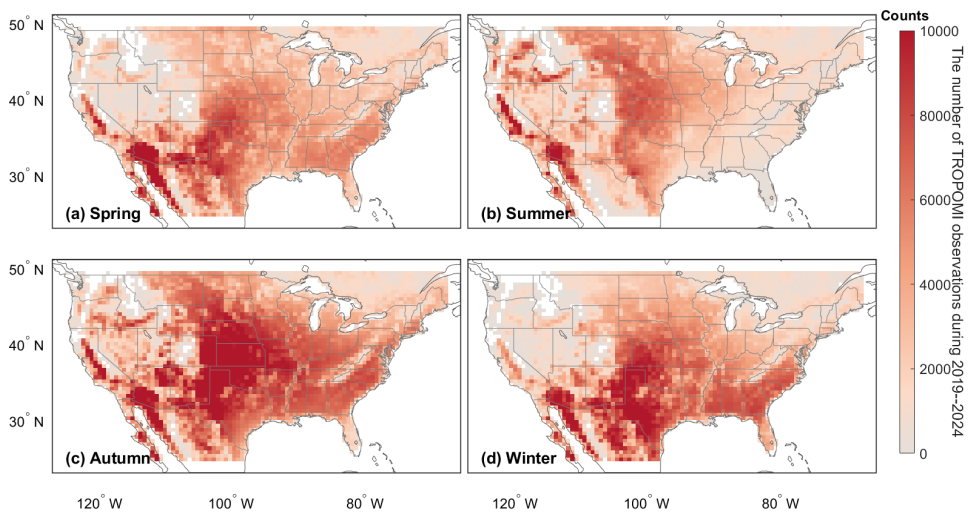

**Fig. S6** The number of satellite observations (the blended TROPOMI + GOSAT satellite data) for each season during 2019–2024 at a  $0.5^\circ$  latitude by  $0.625^\circ$  longitude grid resolution. Seasons for each grid cell are defined as spring (March–May), summer (June–August), autumn (September–November), and winter (December–February).

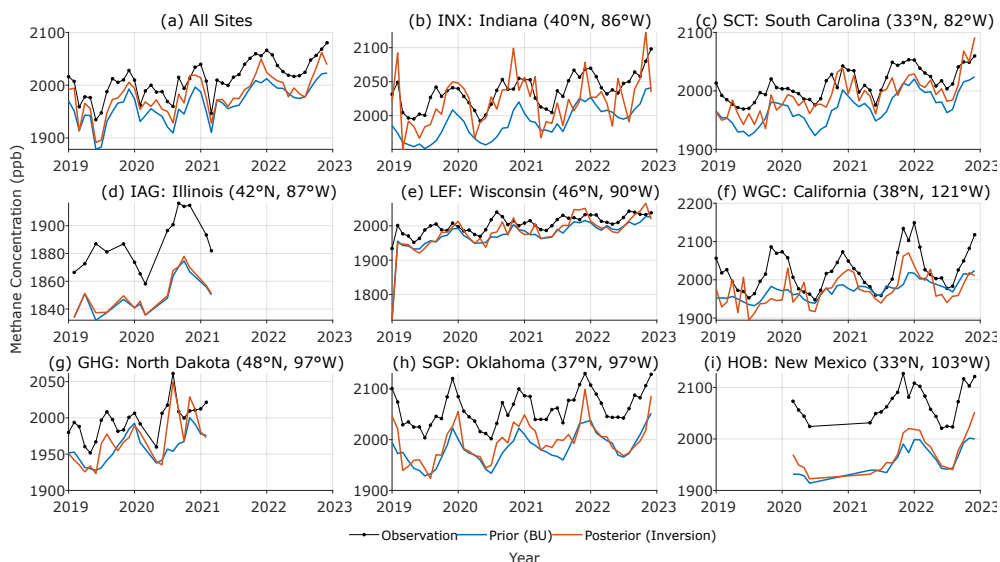

**Fig. S7** Monthly mean average of GEOS-Chem (GC) output using posterior emissions (red line), bottom-up emissions (blue line), and in-situ observations (black line), from (a) all in-situ data (Note that we simply averaged all the data for each month and did not weight them by region.), (b) INX, Indiana, USA ( $40^{\circ}\text{N}$ ,  $86^{\circ}\text{W}$ ), (c) SCT, South Carolina, USA ( $33^{\circ}\text{N}$ ,  $82^{\circ}\text{W}$ ), (d) IAG, Illinois, USA ( $42^{\circ}\text{N}$ ,  $87^{\circ}\text{W}$ ), (e) LEF, Wisconsin, USA ( $46^{\circ}\text{N}$ ,  $90^{\circ}\text{W}$ ), (f) WGC, California, USA ( $38^{\circ}\text{N}$ ,  $121^{\circ}\text{W}$ ), (g) GHG, USA ( $48^{\circ}\text{N}$ ,  $97^{\circ}\text{W}$ ), (h) SGP, Oklahoma, USA ( $37^{\circ}\text{N}$ ,  $97^{\circ}\text{W}$ ), and (i) HOB, New Mexico, USA ( $33^{\circ}\text{N}$ ,  $103^{\circ}\text{W}$ ). In this figure, bottom-up emissions refers to the mean of the GCP models plus EDGAR plus other emissions sources from HEMCO. Statistical metrics, including the Pearson correlation coefficient (R), Root Mean Square Error (RMSE), Mean Bias Error (MBE), and Mean Absolute Error (MAE), are provided for both prior and posterior simulations. All data are filtered within the range of 1800–2400 ppb.

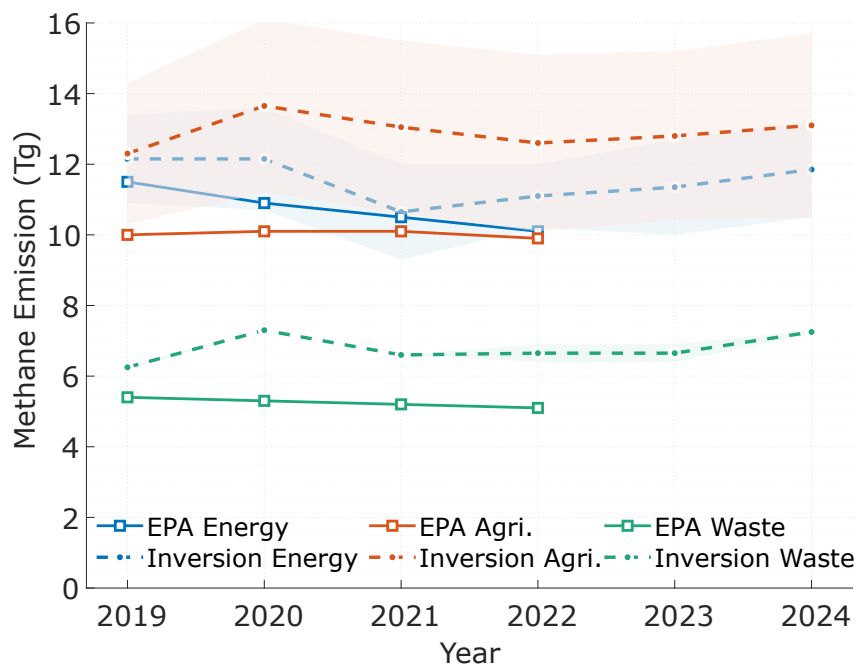

**Fig. S8** Sectoral methane emissions in US for EPA GHGI versus inversion estimates. This figure compares bottom-up estimates (EPA, solid lines) with our top-down inversion estimates (dashed lines with uncertainty envelopes) across three key sectors, including energy (blue), agriculture (orange), and waste (green). The inversion results consistently suggest higher emissions than official inventories, with shaded regions representing the min-max range of the inversion ensemble.

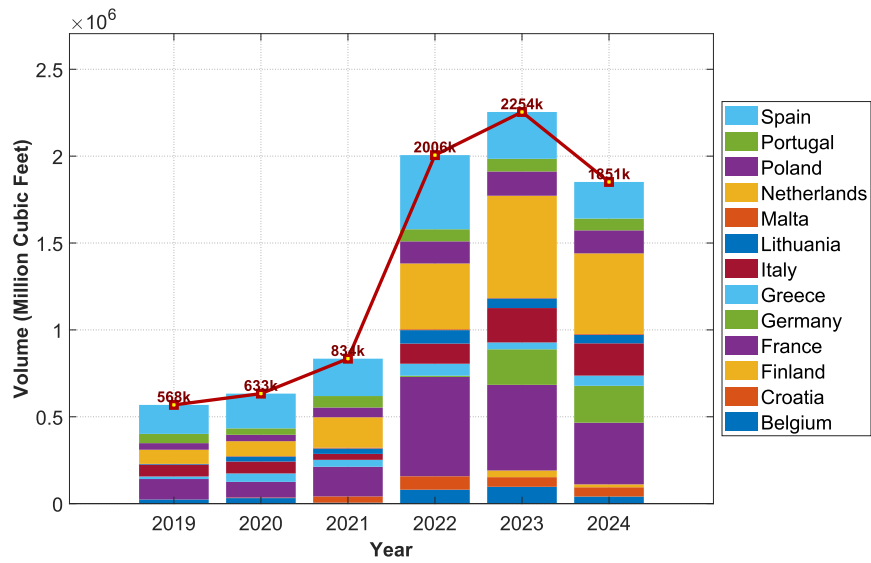

**Fig. S9** U.S. Liquefied Natural Gas (LNG) export volumes to European Union member states during 2019–2024. This figure illustrates the significant surge in U.S. LNG exports to the European Union starting in 2022. Data processed from the U.S. Energy Information Administration [22] (EIA, 2025) Natural Gas Export Reports.

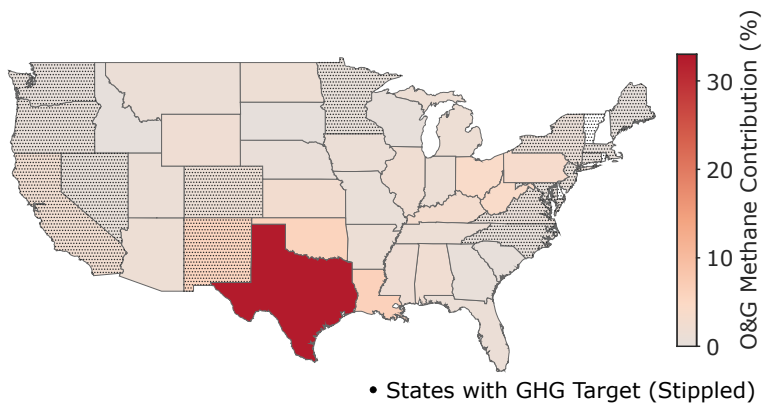

**Fig. S10** State-level GHG reduction targets and contributions to U.S. O&G methane emissions. The base map illustrates each state’s proportional contribution (%) to the total U.S. oil and gas methane emissions. Emission values are calculated as the absolute ensemble average across eight scenarios spanning the 2019–2024 period. States that have statutory GHG reduction targets are denoted by stippling (black dots).

## 145 References

- 146 [1] Thompson, R. L. *et al.* Methane fluxes in the high northern latitudes for 2005-  
147 2013 estimated using a Bayesian atmospheric inversion. *Atmospheric Chemistry*  
148 *and Physics* **17**, 3553–3572 (2017).
- 149 [2] Yu, X. *et al.* Aircraft-based inversions quantify the importance of wetlands and  
150 livestock for Upper Midwest methane emissions. *Atmospheric Chemistry and*  
151 *Physics* **21**, 951–971 (2021).
- 152 [3] Peng, S. *et al.* Wetland emission and atmospheric sink changes explain methane  
153 growth in 2020. *Nature* **612**, 477–482 (2022).
- 154 [4] Qu, Z. *et al.* Attribution of the 2020 surge in atmospheric methane by inverse  
155 analysis of GOSAT observations. *Environmental Research Letters* **17** (2022).
- 156 [5] Chen, W., Zhang, Y. & Liang, R. Converging evidence for reduced global  
157 atmospheric oxidation in 2020. *National Science Review* **12**, nwaf232 (2025). URL  
158 <https://doi.org/10.1093/nsr/nwaf232>.
- 159 [6] Ciais, P. *et al.* Why methane surged in the atmosphere during the early 2020s.  
160 *Science* **24**, 2026 (2026). URL <https://www.science.org/doi/10.1126/science.adx8262>.  
161
- 162 [7] Cho, T., Chung, J., Miller, S. M. & Saibaba, A. K. Computationally efficient meth-  
163 ods for large-scale atmospheric inverse modeling. *Geoscientific Model Development*  
164 **15**, 5547–5565 (2022).
- 165 [8] Chen, A. *et al.* Spatial and temporal distribution of global wetland methane  
166 emissions during 2019–2020 estimated from satellite observations. *Journal of*  
167 *Geophysical Research: Atmospheres* **130** (2025).
- 168 [9] EPA. Waste Emissions Charge (2025). URL [https://www.epa.gov/  
169 inflation-reduction-act/waste-emissions-charge](https://www.epa.gov/inflation-reduction-act/waste-emissions-charge).
- 170 [10] Ramseur, J. L. Inflation Reduction Act Methane Emissions Charge: Overview  
171 and Developments. CRS Report R48475, Congressional Research Service (2025).  
172 URL <https://www.congress.gov/crs-product/R48475>.
- 173 [11] EPA. CPRG Selected Applications by Sector - Waste and Materi-  
174 als Management (2024). URL [https://www.epa.gov/inflation-reduction-act/  
175 cprg-selected-applications-sector-waste-and-materials-management](https://www.epa.gov/inflation-reduction-act/cprg-selected-applications-sector-waste-and-materials-management).
- 176 [12] EPA. Methane Emissions Reduction Program (2024). URL [https://www.epa.  
177 gov/inflation-reduction-act/methane-emissions-reduction-program](https://www.epa.gov/inflation-reduction-act/methane-emissions-reduction-program).
- 178 [13] Global Methane Pledge. Global Methane Pledge (2025). URL [https://www.  
179 globalmethanepledge.org/news/open-letter-global-methane-pledge-endorsers](https://www.globalmethanepledge.org/news/open-letter-global-methane-pledge-endorsers).

- 180 [14] The White House. Fact Sheet: President Donald J. Trump Withdraws the United  
181 States from International Organizations that Are Contrary to the Interests of the  
182 United States (2026). URL [https://www.whitehouse.gov/fact-sheets/2026/01/  
183 fact-sheet-president-donald-j-trump-withdraws-the-united-states-from-international-organizations-that-are-con](https://www.whitehouse.gov/fact-sheets/2026/01/fact-sheet-president-donald-j-trump-withdraws-the-united-states-from-international-organizations-that-are-con)  
184 Accessed: 2026-03-31.
- 185 [15] Liu, D. C. & Nocedal, J. On the limited memory BFGS method for large scale  
186 optimization. *Mathematical Programming* **45**, 503–528 (1989).
- 187 [16] National Archives. Code of Federal Regulations, Title 40, Protection of Environ-  
188 ment, Part 60. Electronic Code of Federal Regulations (eCFR) (2026). URL [https:  
189 //www.ecfr.gov/current/title-40/chapter-I/subchapter-C/part-60](https://www.ecfr.gov/current/title-40/chapter-I/subchapter-C/part-60). Accessed:  
190 March 27, 2026.
- 191 [17] Vizcarra, H. EPA’s Final Methane Emissions Rules Roll Back Standards  
192 and Statutory Authority. Harvard Law School Environmental & Energy Law  
193 Program (EELP) Legal Analysis (2020). URL [https://eelp.law.harvard.edu/  
194 epas-final-methane-emissions-rule-rolls-back-standards-and-statutory-authority/](https://eelp.law.harvard.edu/epas-final-methane-emissions-rule-rolls-back-standards-and-statutory-authority/).  
195 Updated to reflect the publishing of rules in the Federal Register. Accessed:  
196 2026-03-31.
- 197 [18] Shields, L. Greenhouse Gas Emissions Reduction Targets and  
198 Market-based Policies. National Conference of State Legisla-  
199 tures (NCSL) Report (2023). URL [https://www.ncsl.org/energy/  
200 greenhouse-gas-emissions-reduction-targets-and-market-based-policies](https://www.ncsl.org/energy/greenhouse-gas-emissions-reduction-targets-and-market-based-policies).
- 201 [19] Hu, L. *et al.* An unexpected seasonal cycle in U.S. oil and gas methane emissions.  
202 *Environmental Science & Technology* **59** (2025). URL [https://pubs.acs.org/doi/  
203 10.1021/acs.est.4c14090](https://pubs.acs.org/doi/10.1021/acs.est.4c14090).
- 204 [20] Worden, J. R. *et al.* The 2019 methane budget and uncertainties at 1° resolution  
205 and each country through Bayesian integration of GOSAT total column methane  
206 data and a priori inventory estimates. *Atmospheric Chemistry and Physics* **22**,  
207 6811–6841 (2022). URL <https://acp.copernicus.org/articles/22/6811/2022/>.
- 208 [21] Nesser, H. *et al.* High-resolution US methane emissions inferred from an inversion  
209 of 2019 TROPOMI satellite data: contributions from individual states, urban  
210 areas, and landfills. *Atmospheric Chemistry and Physics* **24**, 5069–5091 (2024).  
211 URL <https://acp.copernicus.org/articles/24/5069/2024/>.
- 212 [22] U.S. Energy Information Administration. U.S. Natural Gas Exports and Re-  
213 Exports by Country. EIA Data Browser (2026). URL [https://www.eia.gov/  
214 dnav/ng/ng\\_move.expc.s1.a.htm](https://www.eia.gov/dnav/ng/ng_move.expc.s1.a.htm). Annual export volumes (Million Cubic Feet)  
215 for Pipeline (Canada, Mexico) and LNG during 1973–2025. Accessed: 2026-03-31.
